# Supplementary material
Source: publisher site journal article supplement (https://www.dovepress.com/article/509297)
Supplement: Supplementary file 1 [file get_supplementary_file.php]

**Supplementary Table S1.** Self-confidence responses descriptives. The p-value was computed applying the Wilcoxon signed-rank test.

| STAND | SELF-CONFIDENCE IN PERFORMING OR KNOWING CERTAIN PROCEDURES | PRE-COURSE MEDIAN (IQR) | POST COURSE MEDIAN (IQR) | p-VALUE |
| --- | --- | --- | --- | --- |
| RYND | Venous Puncture | 2.5 (1-3) | 4 (4-5) | <0.001 |
| Peripheric Venous Catheter placement | 1 (1-2) | 4 (4-5) | 0.032 |
| Intramuscular and Intradermal injection | 3 (1-4) | 4 (3.75-5) | <0.001 |
| Knowing the role of venous puncture in the hospital | 2 (1-3) | 5 (4-5) | <0.001 |
| SELDINGER | ABG interpretation | 1 (1-2) | 4 (3-4) | <0.001 |
| Radial artery pulse palpation | 3 (2-4) | 5 (4-5) | <0.001 |
| Peripheric arterial catheter | 1 (1-2) | 4 (2-4) | <0.001 |
| Radial artery drawing | 2 (1-3) | 5 (4-5) | <0.001 |
| TAKAMINE | Cardiac arrest recognition | 3 (2-4) | 5 (4-5) | <0.001 |
| CPR in case of cardiac arrest | 3 (2-4) | 5 (4-5) | <0.001 |
| CPR protocols | 2 (1-3) | 4 (4-5) | <0.001 |
| Recognition of cardiac arrest onset | 2 (2-3) | 4 (4-5) | <0.001 |
| CPR maneuvers | 2.5 (2-4) | 4 (4-5) | <0.001 |
| LEATT | Recognition of fractures | 3 (2-3) | 4 (4-4) | <0.001 |
| First Aid in case of fractures | 3 (2-4) | 4 (4-5) | <0.001 |
| Cervical collar | 2 (1-3) | 5 (4-5) | <0.001 |
| Achieving hemostasis | 2 (1-3) | 5 (4-5) | <0.001 |
| SPALLANZANI | ECO FAST | 1 (1-2) | 4 (3-4) | <0.001 |
| Interpretation of ECO FAST | 1 (1-1) | 4 (3-4) | <0.001 |
| EINTHOVEN | Rapid interpretation of ECG | 2 (1-3) | 4 (3-4) | <0.001 |
| Performing ECG | 3 (1-4) | 4 (4-5) | <0.001 |
| The decision if an ECG is necessary | 2 (1-4) | 4 (3-4) | <0.001 |
| Integration of ECG in interdisciplinary management of patients | 2 (1-3) | 4 (3-4) | <0.001 |
| QUINCKE | Lumbar puncture | 1 (1-2) | 3 (3-4) | <0.001 |
| Local or regional rachianesthesia | 1 (1-1.25) | 3 (3-4) | <0.001 |
| Asepsis and antisepsis protocols | 2 (2-3.25) | 5 (4-5) | <0.001 |
| Integrating asepsis and antisepsis in interdisciplinary patient management | 2 (1-3) | 4 (4-5) | <0.001 |
| BRAIN | Airway evaluation | 2 (2-3) | 4 (4-4.25) | <0.001 |
| Oxygen Therapy | 2 (1-3) | 4 (3.75-5) | <0.001 |
| Supraglottic devices | 1 (1-2) | 4 (4-5) | <0.001 |
| GARCIA | Orothacheal intubation | 1 (1-2) | 4 (3-4) | <0.001 |
| Induction of anesthesia in orotracheal intubation | 1 (1-2) | 4 (3-4) | <0.001 |
| Orotracheal intubation decision | 1 (1-2) | 4 (3-5) | <0.001 |
| DONATTI | Surgical instruments | 2 (1-3) | 4 (4-4) | <0.001 |
| Surgical nodes and sutures | 1 (1-2) | 4 (4-4) | <0.001 |
| Confidence in using surgical abilities in real-life cases | 2 (1-3) | 3 (2-4) | <0.001 |

**Supplementary Table S2.** Participants’ self-reported self-confidence levels before and after the workshop divided by each study year.

| **Stand** | **year** | **Pre course median** | **Pre**  **Course**  **Q1** | **Pre**  **Course**  **Q3** | **Post**  **Course**  **median** | **Post**  **Course**  **Q1** | **Post**  **Course**  **Q3** |
| --- | --- | --- | --- | --- | --- | --- | --- |
| Rynd | 4 | 7.0 | 6.0 | 13.00 | 16.0 | 15.00 | 20.00 |
| 5 | 9.0 | 6.0 | 11.00 | 17.0 | 15.00 | 20.00 |
| 6 | 11.0 | 6.0 | 12.00 | 17.0 | 16.00 | 20.00 |
| Seldinger | 4 | 9.0 | 6.0 | 10.00 | 15.0 | 15.00 | 17.00 |
| 5 | 8.0 | 6.0 | 10.00 | 16.0 | 15.00 | 17.00 |
| 6 | 8.0 | 7.0 | 10.00 | 15.5 | 15.00 | 17.00 |
| Takamine | 4 | 11.0 | 9.0 | 14.00 | 18.0 | 16.00 | 19.00 |
| 5 | 11.0 | 9.0 | 13.00 | 18.0 | 16.00 | 19.00 |
| 6 | 10.5 | 9.0 | 11.00 | 18.0 | 16.25 | 19.00 |
| Leatt | 4 | 9.0 | 7.0 | 14.00 | 18.0 | 16.00 | 18.00 |
| 5 | 10.0 | 7.0 | 12.00 | 18.0 | 15.00 | 19.00 |
| 6 | 9.5 | 9.0 | 10.75 | 18.0 | 17.00 | 18.00 |
| Spallanzani | 4 | 2.0 | 2.0 | 2.00 | 6.0 | 6.00 | 8.00 |
| 5 | 2.0 | 2.0 | 3.00 | 7.0 | 6.00 | 8.00 |
| 6 | 2.0 | 2.0 | 2.00 | 8.0 | 6.00 | 9.75 |
| Einthoven | 4 | 9.0 | 5.0 | 13.00 | 16.0 | 13.00 | 17.00 |
| 5 | 11.0 | 5.0 | 13.00 | 16.0 | 14.00 | 17.00 |
| 6 | 10.0 | 6.5 | 13.00 | 16.5 | 14.00 | 17.00 |
| Quincke | 4 | 7.0 | 5.0 | 9.00 | 15.0 | 14.00 | 17.00 |
| 5 | 10.0 | 5.0 | 11.00 | 15.0 | 14.00 | 16.00 |
| 6 | 9.0 | 6.0 | 10.00 | 15.0 | 13.00 | 16.00 |
| Brain | 4 | 5.0 | 4.0 | 8.00 | 12.0 | 11.00 | 13.00 |
| 5 | 6.0 | 4.0 | 8.00 | 12.0 | 11.00 | 13.00 |
| 6 | 6.0 | 5.0 | 8.00 | 13.0 | 12.00 | 14.75 |
| Garcia | 4 | 4.0 | 3.0 | 6.00 | 9.0 | 8.00 | 12.00 |
| 5 | 4.0 | 3.0 | 5.00 | 12.0 | 9.00 | 13.00 |
| 6 | 3.0 | 3.0 | 4.00 | 12.0 | 9.00 | 13.00 |
| Donatti | 4 | 6.0 | 4.0 | 9.00 | 10.0 | 10.00 | 12.00 |
| 5 | 6.0 | 4.0 | 6.00 | 12.0 | 9.00 | 12.00 |
| 6 | 5.0 | 4.0 | 6.75 | 12.0 | 10.00 | 13.00 |

Supplementary Table 3

| **Question number** | **HOW CAPABLE AM I ….** | **PRE-COURSE** | **POST COURSE** |
| --- | --- | --- | --- |
| **Q1** | **To be a follower in a resuscitation team** | **3 (3-4)** | **4 (4-5)** |
| **Q2** | **To be a leader in a resuscitation team** | **2 (2-3)** | **4 (3-5)** |
| Q3 | To know the role of venous puncture in the hospital | 2 (2-3) | 5 (4-5) |
| Q4 | To perform venous puncture | 2 (1.75-3) | 4 (3.75-5) |
| Q5 | To perform venous puncture in a medical team | 3 (2-4) | 4 (4-5) |
| Q6 | To perform arterial blood gas analysis on a patient | 2 (1-3) | 4 (3-4) |
| Q7 | To perform arterial blood gas analysis as a result of the specialist doctor | 2 (1-3) | 4 (3-4) |
| Q8 | To be integrated as a member of the polytrauma rescue team | 2 (2-4) | 4 (4-5) |
| **Q9** | **To coordinate a team of doctors in trauma management** | **2 (1-4)** | **3 (3-4)** |
| Q10 | To perform ECO FAST | 2 (1-2) | 4 (3-4) |
| Q11 | To perform an ECG on a patient | 2 (2-3) | 4 (4-4) |
| Q12 | To integrate ECG in the interdisciplinary management of the patient | 2 (2-3) | 4 (4-4) |
| Q13 | To perform lumbar puncture as a procedure in the interdisciplinary management of the patient | 2 (1-3) | 4 (4-5) |
| Q14 | To integrate supraglottic devices in the intrahospital patient management | 2 (1-3) | 4 (3-4) |
| **Q15** | **To participate in a surgical team** | **2 (1-3)** | **3 (2-4)** |

**PRE-COURSE GENERAL FORM**

**“Basic practice in interdisciplinary approach of a clinical case” workshop**

| **PARTICIPANT CODE** |  |  |  |
| --- | --- | --- | --- |

**PART I- THEORETIC EVALUATION**

**The participants will answer 30 questions with multiple-choice or single-choice responses. The single-choice questions are marked with *. The results will be confidential, and participants will remain anonymous, with their names being replaced by a unique original code designated for the study.**

1. The four T’s that are part of the reversible causes of cardiac arrest are:
2. Hypoxia
3. Cardiac tamponade
4. Torsade de points
5. Hyperkalemia
6. Toxins
7. The chain of survival in cardiac resuscitation includes:
8. Early recognition of cardiac arrest
9. Immediate cardiopulmonary resuscitation (CPR)
10. Post-resuscitation care
11. Rapid defibrillation and advanced life support
12. Delay in alerting the emergency services
13. The correct dose of adrenaline administration during cardiac arrest is:
14. 1 mg intraosseous every 3-5 minutes
15. 2-3 mg intraosseous every 3-5 minutes
16. 10 mg intravenous every 3-5 minutes
17. 1 mg intravenous every 3-5 minutes
18. 1 mg endotracheal every 3-5 minutes
19. Select the correct answers regarding venous blood collection:
20. It is collected from the veins of the antecubital fossa in adults
21. It is collected from the jugular veins in infants
22. It is collected from the fontanelles in children
23. Blood samples are collected in the morning, after 10-12 hours of fasting
24. Breakfast can influence blood glucose levels, serum lipids, and other blood parameters
25. Select the correct associations regarding the types of vacutainers:
26. Red-topped vacutainer, without anticoagulant
27. Purple-topped vacutainer, for biochemical analyses
28. Purple-topped vacutainer, for hematological analyses
29. Black-topped vacutainer, for ESR (erythrocyte sedimentation rate)
30. Green-topped vacutainer, without anticoagulant
31. Venous blood collection from the antecubital fossa can be done with the following instruments:
32. Syringe with needle
33. Cannula
34. Vacuum blood collection system (holder with built-in needle)
35. Central venous catheter
36. Intravenous infusion set
37. What does arterial access involve?
38. It is a technique performed under antiseptic conditions
39. It is used for a single arterial blood collection
40. A non-invasive technique in the management of an acute patient
41. It can be performed using ultrasound
42. It can be performed using X-rays
43. Which blood parameters can be analyzed through an ASTRUP test?
    1. Ionogram
    2. Alkaline phosphatase
    3. pH
    4. Anion gap
    5. Blood glucose
44. Arterial access can be associated with the following complications:
45. Pneumothorax
46. Infection
47. Limb amputation
48. Hemorrhage
49. Ischemia of the volar surface of the hand in the case of radial access
50. The principles of fracture immobilization are:
51. Placing the victim in the safety position
52. Stabilizing and immobilizing the joints proximal and distal to the fracture site
53. Realigning bone fragments in the case of displaced fractures
54. Securing the immobilized limb to the body
55. Gentle handling
56. The application of a tourniquet is done according to the following principles:
57. Proximal application in the case of venous hemorrhages
58. Distal application in the case of venous hemorrhages
59. Proximal application in the case of arterial hemorrhages
60. Releasing the tourniquet every 15-20 minutes
61. Noting the exact time of tourniquet application
62. The steps for applying a cervical collar are:
63. Mobilizing the victim's cervical spine to check for fractures
64. Gentle touching the victim’s cervical spine to locate the fracture
65. Measuring the length of the victim’s neck
66. Adjusting the size of the collar
67. Pre-forming the collar before applying
68. What can be visualized in the perisplenic ultrasound window?
69. Right colonic flexure
70. VIth hepatic segment
71. Right kidney
72. Left subphrenic space
73. Spleen
74. In the perisplenic ultrasound window, the following anatomical elements can be visualized:
75. Left colonic flexure
76. Left kidney
77. Left atrium
78. Left subphrenic space
79. Spleen
80. The following indications are part of the FAST ultrasound technique:
81. Hypotensive patient
82. Patient in resuscitation efforts
83. Pregnant patient
84. Cardiac arrest
85. Cardiac tamponade
86. Which of the following statements regarding the correct placement of electrocardiograph (ECG) electrodes are true?
87. The red electrode is placed on the left forearm
88. The V4 electrode is placed in the 5th intercostal space, on the left midclavicular line
89. The V1 and V2 electrodes are placed in the 4th intercostal space, parasternal
90. The green and black electrodes are positioned at the level of the upper limbs
91. In a standard electrocardiogram, 6 precordial electrodes are placed
92. In which of the following leads can the function of the inferior part of the heart be studied?
93. aVR
94. DII
95. DIII
96. aVF
97. V3
98. The false statements regarding the electric axis of the heart are:
99. The physiological electric axis of the heart is 60 degrees
100. The electric axis of the heart is verticalized in individuals suffering from obesity
101. The electric axis of the heart is determined using Einthoven's triangle or by quick methods
102. A positive QRS complex in DI and aVF will produce an electric axis between 0 and 90 degrees
103. The electric axis cannot provide information about possible ventricular hypertrophy
104. To which type of anesthesia does spinal anesthesia belong?
     1. General anesthesia
     2. Regional anesthesia
     3. Local anesthesia
     4. Systemic anesthesia
     5. Conduction anesthesia
105. What is spinal anesthesia used for?
106. It is used for minor surgical interventions and acts on a small area of the body, such as tooth extraction
107. It is used for surgical interventions performed in more extensive or deeper areas of the body, without loss of consciousness, such as inguinal hernia repair
108. It is used for surgical interventions that induce a state of controlled unconsciousness, during which the patient will require orotracheal intubation
109. It is used for surgical interventions such as endoscopy or colonoscopy, administering small amounts of anesthetic medications to produce a sleep-like state
110. It is used for surgical interventions performed in more extensive or deeper areas of the body, without loss of consciousness, such as appendectomy
111. What is asepsis?
112. A prophylactic method
113. A curative method
114. A prophylactic method that includes all means to prevent contact of germs with the surgical wound
115. A curative method that includes all means to prevent contact of germs with the surgical wound
116. A prophylactic method that includes all means that do not prevent contact of germs with the surgical wound
117. The appropriate size of the oropharyngeal cannula is chosen how?
     1. It is chosen according to whether the patient is an adult or a child
     2. The distance from the mouth corner to the angle of the mandible is measured
     3. By color
     4. The distance from the mouth corner to the angle of the lips is measured
     5. The distance from the mouth corner to the angle of the nose is measured
118. How is the oropharyngeal cannula correctly inserted before twisting it?
119. Oriented with the concavity towards the hard palate
120. Oriented with the concavity towards the tongue
121. Oriented with the convexity towards the hard palate
122. Oriented with the convexity towards the tongue
123. Oriented through the right or left nostril
124. When is oxygen therapy indicated?
125. Acute pulmonary edema
126. Acute renal failure
127. Choledochal obstruction
128. Bronchial asthma attack
129. Urinary tract infection
130. * If the intubation tube is advanced too far, the most likely position of the tube will be:
131. Right bronchus
132. Left bronchus
133. At the level of the carina
134. At the level of the 3rd-4th tracheal rings
135. At the level of the laryngo-pharynx
136. Indications for orotracheal intubation:
137. Cranial trauma without loss of consciousness
138. Performing radiologic investigations with contrast substance
139. Laparoscopic surgical intervention
140. Comatose patient GCS-6
141. Short-duration urological endoscopic intervention <1h
142. The following are possible complications of direct laryngoscopy and orotracheal intubation:
143. Pneumothorax
144. Pneumoperitoneum
145. Superior laryngeal nerve paralysis
146. Dental injury
147. Selective intubation
148. Which of the following types of antiseptics are used for wound cleaning?
149. Alcohol-based antiseptic
150. Antiseptics that release chlorine
151. Antiseptics that release CO2
152. Potassium permanganate
153. Antiseptics based on phenol and its derivatives
154. How to use scissors:
155. The thumb is inserted into the lower ring
156. The second finger is held along the scissors, ensuring movement accuracy
157. he third finger remains next to the second for better movement accuracy
158. The fourth finger is inserted into the lower ring
159. The fifth finger is inserted into the upper ring
160. Which of the following statements regarding the surgical treatment of wounds is not true:
161. Use of antiseptic solution for the wound
162. Regional anesthesia
163. Exploration of the wound and excision of devitalized, contaminated tissues to transform an accidental wound into a surgical wound
164. Primary or secondary suturing
165. The intention of treatment for a bitten wound is surgical

|  | A | B | C | D | E |  | A | B | C | D | E |
| --- | --- | --- | --- | --- | --- | --- | --- | --- | --- | --- | --- |
| 1 |  |  |  |  |  | 16 |  |  |  |  |  |
| 2 |  |  |  |  |  | 17 |  |  |  |  |  |
| 3 |  |  |  |  |  | 18 |  |  |  |  |  |
| 4 |  |  |  |  |  | 19 |  |  |  |  |  |
| 5 |  |  |  |  |  | 20 |  |  |  |  |  |
| 6 |  |  |  |  |  | 21 |  |  |  |  |  |
| 7 |  |  |  |  |  | 22 |  |  |  |  |  |
| 8 |  |  |  |  |  | 23 |  |  |  |  |  |
| 9 |  |  |  |  |  | 24 |  |  |  |  |  |
| 10 |  |  |  |  |  | 25 |  |  |  |  |  |
| 11 |  |  |  |  |  | 26 |  |  |  |  |  |
| 12 |  |  |  |  |  | 27 |  |  |  |  |  |
| 13 |  |  |  |  |  | 28 |  |  |  |  |  |
| 14 |  |  |  |  |  | 29 |  |  |  |  |  |
| 15 |  |  |  |  |  | 30 |  |  |  |  |  |

**PART II – SELF CONFIDENCE**

1.1 How confident do I feel performing a venipuncture for further analysis?

| **1** | **2** | **3** | **4** | **5** |
| --- | --- | --- | --- | --- |
|  |  |  |  |  |

1.2 How confident do I feel inserting a peripheral venous catheter?

| **1** | **2** | **3** | **4** | **5** |
| --- | --- | --- | --- | --- |
|  |  |  |  |  |

1.3 How confident do I feel in performing an intradermal or intramuscular injection?

| **1** | **2** | **3** | **4** | **5** |
| --- | --- | --- | --- | --- |
|  |  |  |  |  |

1.4 Do I know the role of this procedure in the in-hospital management of the patient?

| **1** | **2** | **3** | **4** | **5** |
| --- | --- | --- | --- | --- |
|  |  |  |  |  |

2.1. How confident do I feel in interpreting an arterial blood gas (ABG) analysis?

| **1** | **2** | **3** | **4** | **5** |
| --- | --- | --- | --- | --- |
|  |  |  |  |  |

2.2. How confident do I feel in determining the pulse at the radial artery?

| **1** | **2** | **3** | **4** | **5** |
| --- | --- | --- | --- | --- |
|  |  |  |  |  |

2.3. How confident do I feel in placing a peripheral arterial catheter?

| **1** | **2** | **3** | **4** | **5** |
| --- | --- | --- | --- | --- |
|  |  |  |  |  |

2.4. How confident do I feel in drawing arterial blood from the radial artery?

| **1** | **2** | **3** | **4** | **5** |
| --- | --- | --- | --- | --- |
|  |  |  |  |  |

3.1. How confident do I feel in recognizing cardiac arrest?

| **1** | **2** | **3** | **4** | **5** |
| --- | --- | --- | --- | --- |
|  |  |  |  |  |

3.2. How confident do I feel in providing first aid in the event of cardiac arrest?

| **1** | **2** | **3** | **4** | **5** |
| --- | --- | --- | --- | --- |
|  |  |  |  |  |

3.3. How confident do I feel in knowing the cardiopulmonary resuscitation (CPR) protocols?

| **1** | **2** | **3** | **4** | **5** |
| --- | --- | --- | --- | --- |
|  |  |  |  |  |

3.4. How confident do I feel in recognizing the mechanisms that lead to cardiac arrest?

| **1** | **2** | **3** | **4** | **5** |
| --- | --- | --- | --- | --- |
|  |  |  |  |  |

3.5. How confident do I feel in performing cardiopulmonary resuscitation (CPR) maneuvers?

| **1** | **2** | **3** | **4** | **5** |
| --- | --- | --- | --- | --- |
|  |  |  |  |  |

4.1 How confident do I feel in recognizing fractures?

| **1** | **2** | **3** | **4** | **5** |
| --- | --- | --- | --- | --- |
|  |  |  |  |  |

4.2. How confident do I feel in providing first aid for a fracture by immobilizing it?

| **1** | **2** | **3** | **4** | **5** |
| --- | --- | --- | --- | --- |
|  |  |  |  |  |

4.3 How confident do I feel in applying a cervical collar?

| **1** | **2** | **3** | **4** | **5** |
| --- | --- | --- | --- | --- |
|  |  |  |  |  |

4.4. How confident do I feel in performing hemostasis?

| **1** | **2** | **3** | **4** | **5** |
| --- | --- | --- | --- | --- |
|  |  |  |  |  |

5.1. How confident do I feel in performing ECO-FAST?

| **1** | **2** | **3** | **4** | **5** |
| --- | --- | --- | --- | --- |
|  |  |  |  |  |

5.2. How confident do I feel in interpreting ECO-FAST?

| **1** | **2** | **3** | **4** | **5** |
| --- | --- | --- | --- | --- |
|  |  |  |  |  |

6.1 How confident do I feel in quickly interpreting an electrocardiogram (ECG)?

| **1** | **2** | **3** | **4** | **5** |
| --- | --- | --- | --- | --- |
|  |  |  |  |  |

6.2 How confident do I feel in performing an electrocardiogram (ECG)?

| **1** | **2** | **3** | **4** | **5** |
| --- | --- | --- | --- | --- |
|  |  |  |  |  |

6.3. How confident do I feel in making the decision to perform an electrocardiogram (ECG) on a patient?

| **1** | **2** | **3** | **4** | **5** |
| --- | --- | --- | --- | --- |
|  |  |  |  |  |

6.4 How confident do I feel in integrating this investigation (ECG) into the interdisciplinary management of the patient?

| **1** | **2** | **3** | **4** | **5** |
| --- | --- | --- | --- | --- |
|  |  |  |  |  |

7.1 How confident do I feel in performing a lumbar puncture?

| **1** | **2** | **3** | **4** | **5** |
| --- | --- | --- | --- | --- |
|  |  |  |  |  |

7.2. How confident do I feel in performing loco-regional anesthesia, such as spinal anesthesia?

| **1** | **2** | **3** | **4** | **5** |
| --- | --- | --- | --- | --- |
|  |  |  |  |  |

7.3. How confident do I feel in following asepsis and antisepsis protocols?

| **1** | **2** | **3** | **4** | **5** |
| --- | --- | --- | --- | --- |
|  |  |  |  |  |

7.4 How confident do I feel in integrating this procedure into the interdisciplinary management of the patient?

| **1** | **2** | **3** | **4** | **5** |
| --- | --- | --- | --- | --- |
|  |  |  |  |  |

8.1 How confident do I feel regarding the airways assessment?

| **1** | **2** | **3** | **4** | **5** |
| --- | --- | --- | --- | --- |
|  |  |  |  |  |

8.2. How confident do I feel in making the decision for oxygen therapy?

| **1** | **2** | **3** | **4** | **5** |
| --- | --- | --- | --- | --- |
|  |  |  |  |  |

8.3. How confident do I feel in using supraglottic devices?

| **1** | **2** | **3** | **4** | **5** |
| --- | --- | --- | --- | --- |
|  |  |  |  |  |

9.1 How confident do I feel in performing orotracheal intubation?

| **1** | **2** | **3** | **4** | **5** |
| --- | --- | --- | --- | --- |
|  |  |  |  |  |

9.2. How confident do I feel in the induction required for orotracheal intubation?

| **1** | **2** | **3** | **4** | **5** |
| --- | --- | --- | --- | --- |
|  |  |  |  |  |

9.3. How confident do I feel in the decision to perform orotracheal intubation?

| **1** | **2** | **3** | **4** | **5** |
| --- | --- | --- | --- | --- |
|  |  |  |  |  |

10.1. How confident do I feel in my knowledge of surgical instruments?

| **1** | **2** | **3** | **4** | **5** |
| --- | --- | --- | --- | --- |
|  |  |  |  |  |

10.2. How confident do I feel in performing surgical knots and sutures?

| **1** | **2** | **3** | **4** | **5** |
| --- | --- | --- | --- | --- |
|  |  |  |  |  |

10.3. How confident do I feel in applying these acquired skills in a real-life situation?

| **1** | **2** | **3** | **4** | **5** |
| --- | --- | --- | --- | --- |
|  |  |  |  |  |

**PART III - TEAMWORK AND LEADERSHIP**

- How confident do I feel about my integration into a resuscitation team as a follower?

| **1** | **2** | **3** | **4** | **5** |
| --- | --- | --- | --- | --- |
|  |  |  |  |  |

- How confident do I feel in coordinating a resuscitation team as a leader?

| **1** | **2** | **3** | **4** | **5** |
| --- | --- | --- | --- | --- |
|  |  |  |  |  |

- How confident do I feel in deciding to perform venous puncture?

| **1** | **2** | **3** | **4** | **5** |
| --- | --- | --- | --- | --- |
|  |  |  |  |  |

- How confident do I feel if I were asked to perform this procedure as part of a team?

| **1** | **2** | **3** | **4** | **5** |
| --- | --- | --- | --- | --- |
|  |  |  |  |  |

- How confident do I feel in deciding to perform an arterial blood gas (ABG) test on a patient?

| **1** | **2** | **3** | **4** | **5** |
| --- | --- | --- | --- | --- |
|  |  |  |  |  |

- How confident do I feel in performing this procedure when requested by the attending physician?

| **1** | **2** | **3** | **4** | **5** |
| --- | --- | --- | --- | --- |
|  |  |  |  |  |

- How confident do I feel about my integration into a trauma rescue team?

| **1** | **2** | **3** | **4** | **5** |
| --- | --- | --- | --- | --- |
|  |  |  |  |  |

- How confident do I feel in coordinating a rescue team involved in trauma management?

| **1** | **2** | **3** | **4** | **5** |
| --- | --- | --- | --- | --- |
|  |  |  |  |  |

- How confident do I feel in requesting an ECO-FAST investigation?

| **1** | **2** | **3** | **4** | **5** |
| --- | --- | --- | --- | --- |
|  |  |  |  |  |

- How confident do I feel in deciding to perform an electrocardiogram (ECG) on a patient?

| **1** | **2** | **3** | **4** | **5** |
| --- | --- | --- | --- | --- |
|  |  |  |  |  |

- How confident do I feel in integrating this investigation (ECG) into the interdisciplinary management of the patient?

| **1** | **2** | **3** | **4** | **5** |
| --- | --- | --- | --- | --- |
|  |  |  |  |  |

- How confident do I feel in integrating this procedure into the interdisciplinary management of the patient?

| **1** | **2** | **3** | **4** | **5** |
| --- | --- | --- | --- | --- |
|  |  |  |  |  |

- How confident do I feel in integrating this procedure into the patient’s in-hospital care approach? (SUPRAGLOTTIC DEVICES)

| **1** | **2** | **3** | **4** | **5** |
| --- | --- | --- | --- | --- |
|  |  |  |  |  |

- How confident do I feel in integrating this procedure into the patient’s in-hospital care approach? (OROTRACHEAL INTUBATION)

| **1** | **2** | **3** | **4** | **5** |
| --- | --- | --- | --- | --- |
|  |  |  |  |  |

- How confident do I feel in participating in a surgical team?

| **1** | **2** | **3** | **4** | **5** |
| --- | --- | --- | --- | --- |
|  |  |  |  |  |
